# Supplementary material
Source: bioRxiv or medRxiv preprint supplement (https://www.biorxiv.org/highwire/filestream/6931/field_highwire_adjunct_files/0/025981-1.pdf)
Supplement: Supplementary file [file 025981-1.pdf]

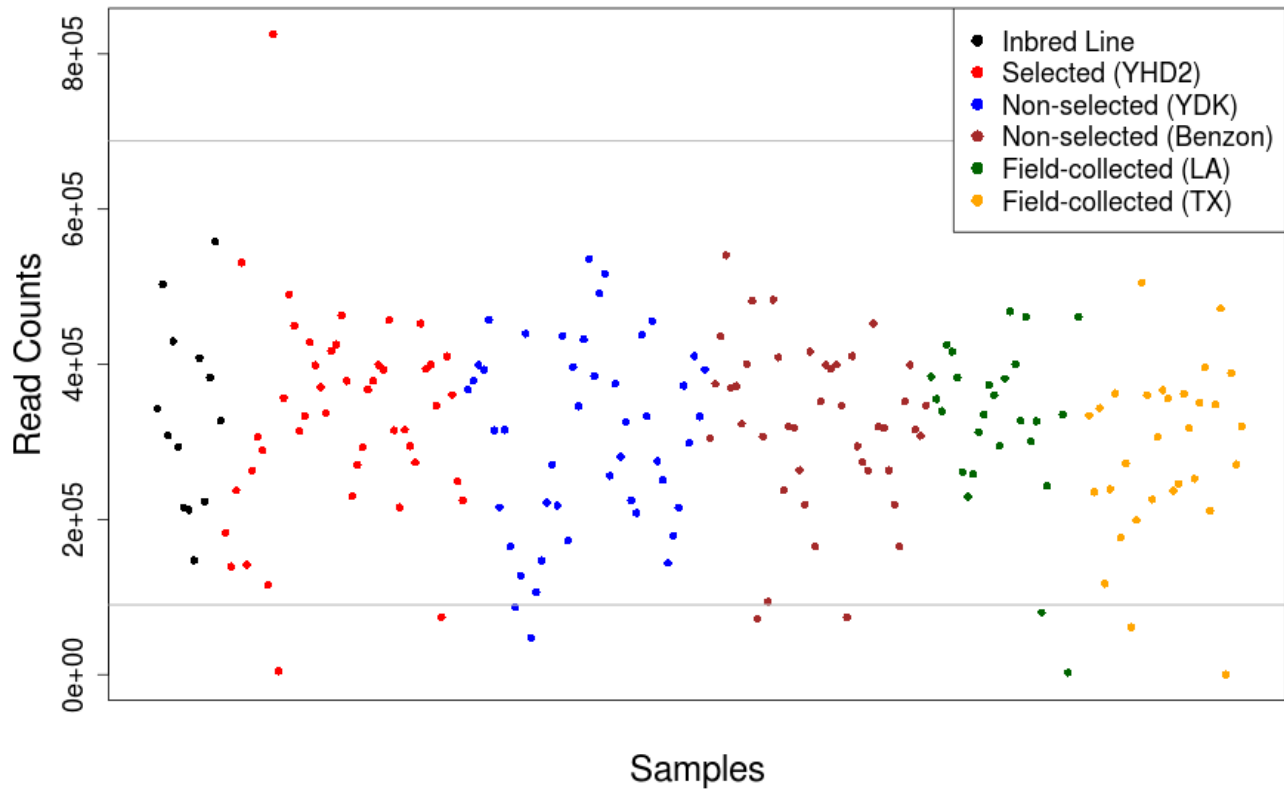

**Supplementary Figure 1** - Read counts per individual, color-coded by population. Individuals with read counts above ( $3\times$ ) and below ( $1/3\times$ ) the grey lines were excluded from downstream analyses.

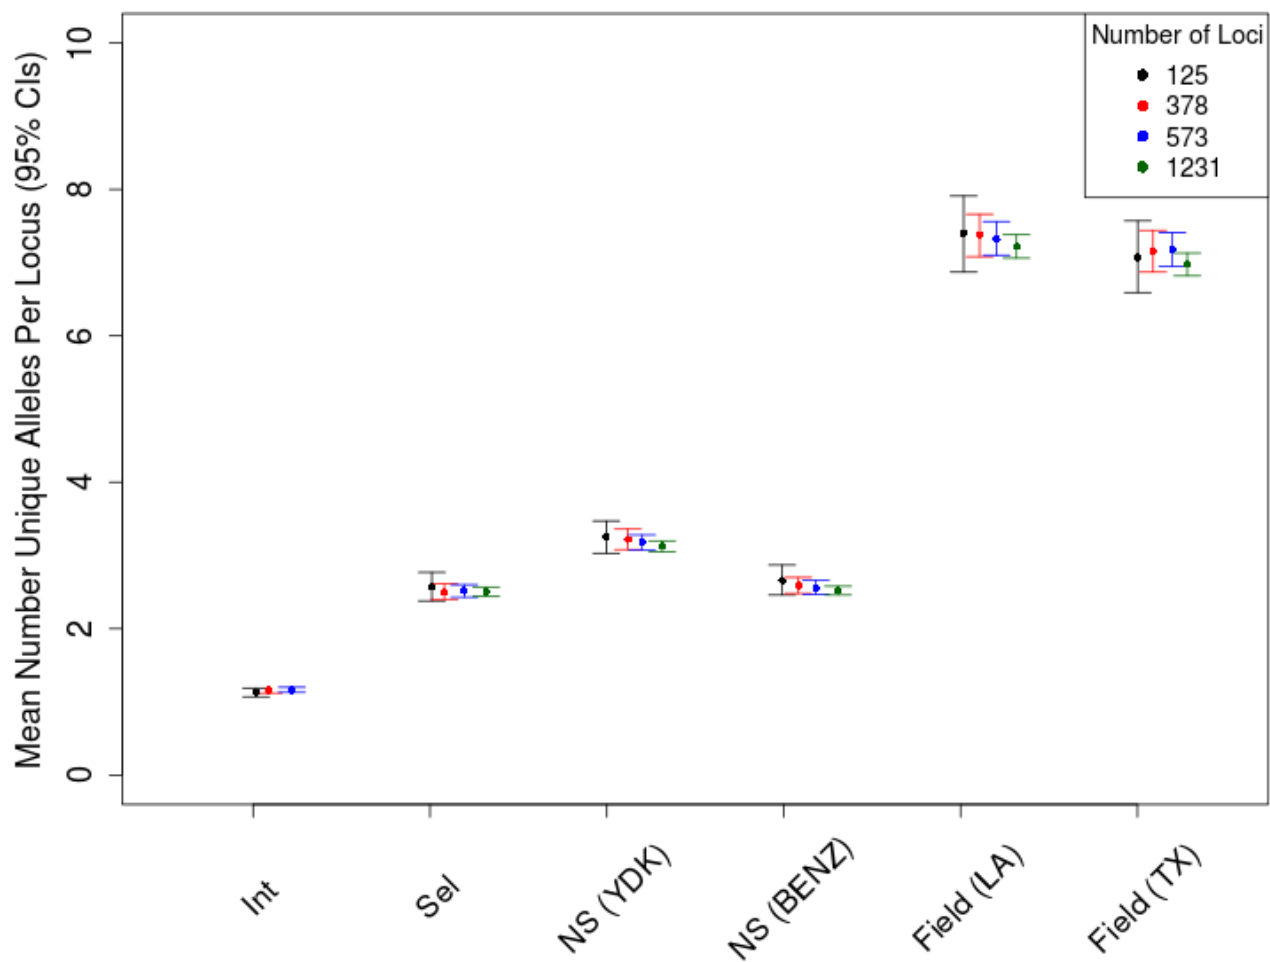

**Supplementary Figure 2** – Plot of genome-wide average number of unique alleles ( $\pm$  95% CIs) across populations. Each dataset, represented by a unique color, contained different numbers of consensus loci. Haplotype sampling was set to either a depth of 6 (data not shown) or 12. Mean numbers of unique loci were not different across datasets within a population, as indicated by overlapping 95% confidence intervals.

**Supplementary Figure 3** - Number of markers per linkage group with a nucleotide diversity value ( $\pi$ ) of greater than zero in the inbred line.

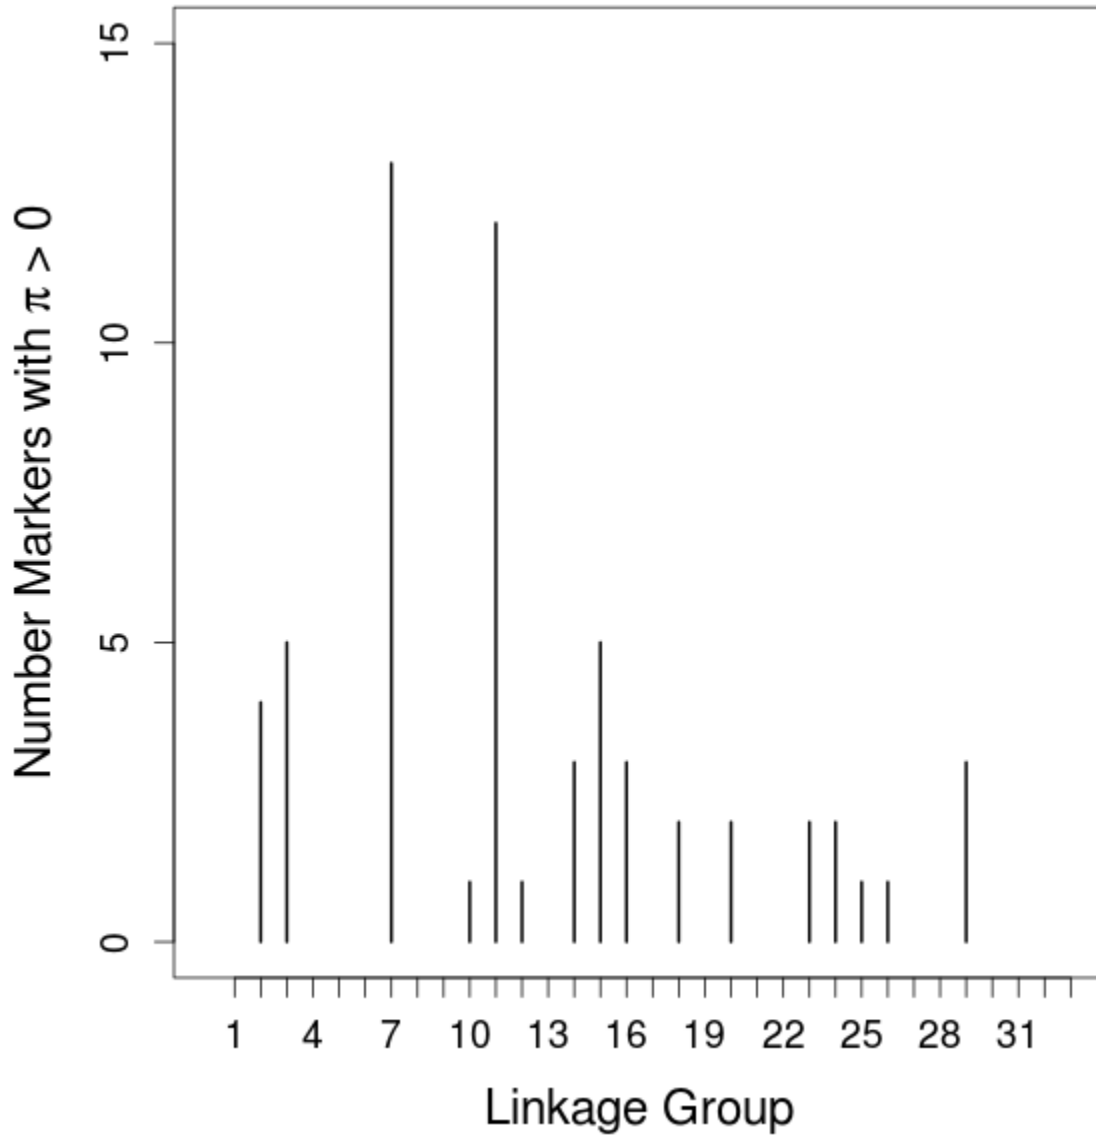

**Supplementary Figure 4** – Number of lineages that remained following each generation of full-sibling mating (orange) during production of the inbred line. The blue line represents the average number of SPMs set up per generation across remaining lineages. Only a single lineage existed following generation 5, at which the blue line represents the number of SPMs set up for the existing line.

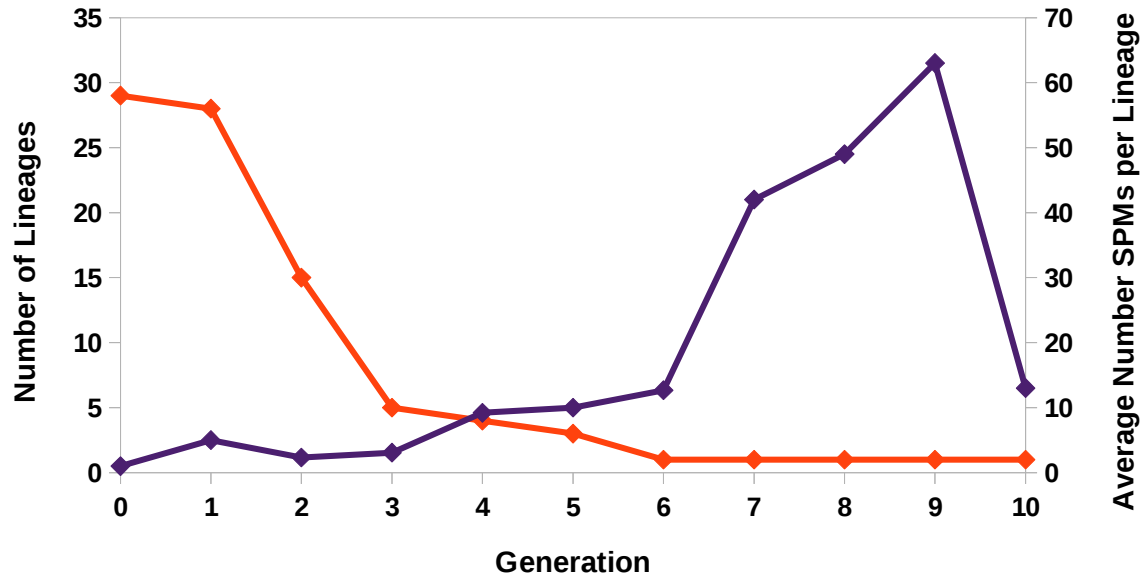

**Supplementary Table 1** – HPSF-purified oligonucleotide sequences (Eurofins MWG Operon LLC, Huntsville, AL, USA) used to create uniquely barcoded double-stranded adapters with an EcoRI overhang site. Two oligonucleotides (p1.1 and p1.2) corresponding to the same barcode were annealed according to Poland *et al.* (2012) to generate each adapter.

| Oligonucleotide Name | Barcode  | Nucleotide Sequence 5'-3'                 |
|----------------------|----------|-------------------------------------------|
| p1.1_EcoRI_CGCGGT    | CGCGGT   | ACACTCTTTCCCTACACGACGCTCTTCCGATCTCGCGGT   |
| p1.1_EcoRI_CTATTA    | CTATTA   | ACACTCTTTCCCTACACGACGCTCTTCCGATCTCTATTA   |
| p1.1_EcoRI_GCCAGT    | GCCAGT   | ACACTCTTTCCCTACACGACGCTCTTCCGATCTGCCAGT   |
| p1.1_EcoRI_GGAAGA    | GGAAGA   | ACACTCTTTCCCTACACGACGCTCTTCCGATCTGGAAGA   |
| p1.1_EcoRI_GTACTT    | GTACTT   | ACACTCTTTCCCTACACGACGCTCTTCCGATCTGTACTT   |
| p1.1_EcoRI_GTTGAA    | GTTGAA   | ACACTCTTTCCCTACACGACGCTCTTCCGATCTGTTGAA   |
| p1.1_EcoRI_TAACGA    | TAACGA   | ACACTCTTTCCCTACACGACGCTCTTCCGATCTTAACGA   |
| p1.1_EcoRI_TGGCTA    | TGGCTA   | ACACTCTTTCCCTACACGACGCTCTTCCGATCTTGGCTA   |
| p1.1_EcoRI_TATTTT    | TATTTT   | ACACTCTTTCCCTACACGACGCTCTTCCGATCTTATTTT   |
| p1.1_EcoRI_CTTGCTT   | CTTGCTT  | ACACTCTTTCCCTACACGACGCTCTTCCGATCTCTTGCTT  |
| p1.1_EcoRI_ATGAAAC   | ATGAAAC  | ACACTCTTTCCCTACACGACGCTCTTCCGATCTATGAAAC  |
| p1.1_EcoRI_AAAAGTT   | AAAAGTT  | ACACTCTTTCCCTACACGACGCTCTTCCGATCTAAAAGTT  |
| p1.1_EcoRI_GAATTCA   | GAATTCA  | ACACTCTTTCCCTACACGACGCTCTTCCGATCTGAATTCA  |
| p1.1_EcoRI_GAACCTC   | GAACCTC  | ACACTCTTTCCCTACACGACGCTCTTCCGATCTGAACCTC  |
| p1.1_EcoRI_GTCGATT   | GTCGATT  | ACACTCTTTCCCTACACGACGCTCTTCCGATCTGTCGATT  |
| p1.1_EcoRI_AACGCCT   | AACGCCT  | ACACTCTTTCCCTACACGACGCTCTTCCGATCTAACGCCT  |
| p1.1_EcoRI_AATATGC   | AATATGC  | ACACTCTTTCCCTACACGACGCTCTTCCGATCTAATATGC  |
| p1.1_EcoRI_ACGTGTT   | ACGTGTT  | ACACTCTTTCCCTACACGACGCTCTTCCGATCTACGTGTT  |
| p1.1_EcoRI_ATTAATT   | ATTAATT  | ACACTCTTTCCCTACACGACGCTCTTCCGATCTATTAATT  |
| p1.1_EcoRI_ATTGGAT   | ATTGGAT  | ACACTCTTTCCCTACACGACGCTCTTCCGATCTATTGGAT  |
| p1.1_EcoRI_CATAAGT   | CATAAGT  | ACACTCTTTCCCTACACGACGCTCTTCCGATCTCATAAGT  |
| p1.1_EcoRI_CGCTGAT   | CGCTGAT  | ACACTCTTTCCCTACACGACGCTCTTCCGATCTCGCTGAT  |
| p1.1_EcoRI_CGGTAGA   | CGGTAGA  | ACACTCTTTCCCTACACGACGCTCTTCCGATCTCGGTAGA  |
| p1.1_EcoRI_CTACGGA   | CTACGGA  | ACACTCTTTCCCTACACGACGCTCTTCCGATCTCTACGGA  |
| p1.1_EcoRI_GCGGAAT   | GCGGAAT  | ACACTCTTTCCCTACACGACGCTCTTCCGATCTGCGGAAT  |
| p1.1_EcoRI_TAGCGGA   | TAGCGGA  | ACACTCTTTCCCTACACGACGCTCTTCCGATCTTAGCGGA  |
| p1.1_EcoRI_TCGAAGA   | TCGAAGA  | ACACTCTTTCCCTACACGACGCTCTTCCGATCTTCGAAGA  |
| p1.1_EcoRI_TCTGTGA   | TCTGTGA  | ACACTCTTTCCCTACACGACGCTCTTCCGATCTTCTGTGA  |
| p1.1_EcoRI_TGCTGGA   | TGCTGGA  | ACACTCTTTCCCTACACGACGCTCTTCCGATCTTGCTGGA  |
| p1.1_EcoRI_ACGACTAC  | ACGACTAC | ACACTCTTTCCCTACACGACGCTCTTCCGATCTACGACTAC |
| p1.1_EcoRI_TAGCATGC  | TAGCATGC | ACACTCTTTCCCTACACGACGCTCTTCCGATCTTAGCATGC |
| p1.1_EcoRI_TAGGCCAT  | TAGGCCAT | ACACTCTTTCCCTACACGACGCTCTTCCGATCTTAGGCCAT |
| p1.1_EcoRI_TGCAAGGA  | TGCAAGGA | ACACTCTTTCCCTACACGACGCTCTTCCGATCTTGCAAGGA |
| p1.1_EcoRI_TGGTACGT  | TGGTACGT | ACACTCTTTCCCTACACGACGCTCTTCCGATCTTGGTACGT |
| p1.1_EcoRI_TCTCAGTC  | TCTCAGTC | ACACTCTTTCCCTACACGACGCTCTTCCGATCTTCTCAGTC |
| p1.1_EcoRI_CCGGATAT  | CCGGATAT | ACACTCTTTCCCTACACGACGCTCTTCCGATCTCCGGATAT |
| p1.1_EcoRI_CGCCTTAT  | CGCCTTAT | ACACTCTTTCCCTACACGACGCTCTTCCGATCTCGCCTTAT |
| p1.1_EcoRI_AACCGAGA  | AACCGAGA | ACACTCTTTCCCTACACGACGCTCTTCCGATCTAACCGAGA |
| p1.1_EcoRI_ACAGGGAA  | ACAGGGAA | ACACTCTTTCCCTACACGACGCTCTTCCGATCTACAGGGAA |
| p1.1_EcoRI_ACGTGGTA  | ACGTGGTA | ACACTCTTTCCCTACACGACGCTCTTCCGATCTACGTGGTA |
| p1.1_EcoRI_CCATGGGT  | CCATGGGT | ACACTCTTTCCCTACACGACGCTCTTCCGATCTCCATGGGT |
| p1.1_EcoRI_CGCGGAGA  | CGCGGAGA | ACACTCTTTCCCTACACGACGCTCTTCCGATCTCGCGGAGA |
| p1.1_EcoRI_CGTGTGGT  | CGTGTGGT | ACACTCTTTCCCTACACGACGCTCTTCCGATCTCGTGTGGT |
| p1.1_EcoRI_GCTGTGGA  | GCTGTGGA | ACACTCTTTCCCTACACGACGCTCTTCCGATCTGCTGTGGA |
| p1.1_EcoRI_GGATTGGT  | GGATTGGT | ACACTCTTTCCCTACACGACGCTCTTCCGATCTGGATTGGT |
| p1.1_EcoRI_GTGAGGGT  | GTGAGGGT | ACACTCTTTCCCTACACGACGCTCTTCCGATCTGTGAGGGT |
| p1.1_EcoRI_TATCGGGA  | TATCGGGA | ACACTCTTTCCCTACACGACGCTCTTCCGATCTTATCGGGA |
| p1.1_EcoRI_TTCCTGGA  | TTCCTGGA | ACACTCTTTCCCTACACGACGCTCTTCCGATCTTTCCTGGA |

**Supplementary Table 1** continued.

| <b>Oligonucleotide Name</b> | <b>Barcode</b> | <b>Nucleotide Sequence 5'-3'</b>                     |
|-----------------------------|----------------|------------------------------------------------------|
| p1.2_EcoRI_CGCGGT           | CGCGGT         | [Phos]AATTACCGCGAGATCGGAAGAGCGTCGTGTAGGGAAAGAGTGT    |
| p1.2_EcoRI_CTATTA           | CTATTA         | [Phos]AATTTAATAGAGATCGGAAGAGCGTCGTGTAGGGAAAGAGTGT    |
| p1.2_EcoRI_GCCAGT           | GCCAGT         | [Phos]AATTACTGGCAGATCGGAAGAGCGTCGTGTAGGGAAAGAGTGT    |
| p1.2_EcoRI_GGAAGA           | GGAAGA         | [Phos]AATTTCTCCAGATCGGAAGAGCGTCGTGTAGGGAAAGAGTGT     |
| p1.2_EcoRI_GTACTT           | GTACTT         | [Phos]AATTAAGTACAGATCGGAAGAGCGTCGTGTAGGGAAAGAGTGT    |
| p1.2_EcoRI_GTTGAA           | GTTGAA         | [Phos]AATTTTCAACAGATCGGAAGAGCGTCGTGTAGGGAAAGAGTGT    |
| p1.2_EcoRI_TAACGA           | TAACGA         | [Phos]AATTTTCGTTAAGATCGGAAGAGCGTCGTGTAGGGAAAGAGTGT   |
| p1.2_EcoRI_TGGCTA           | TGGCTA         | [Phos]AATTTAGCCAAGATCGGAAGAGCGTCGTGTAGGGAAAGAGTGT    |
| p1.2_EcoRI_TATTTTT          | TATTTTT        | [Phos]AATTAATAAATAAGATCGGAAGAGCGTCGTGTAGGGAAAGAGTGT  |
| p1.2_EcoRI_CTTGCTT          | CTTGCTT        | [Phos]AATTAAGCAAGAGATCGGAAGAGCGTCGTGTAGGGAAAGAGTGT   |
| p1.2_EcoRI_ATGAAAC          | ATGAAAC        | [Phos]AATTGTTTCATAGATCGGAAGAGCGTCGTGTAGGGAAAGAGTGT   |
| p1.2_EcoRI_AAAAGTT          | AAAAGTT        | [Phos]AATTAACTTTTAGATCGGAAGAGCGTCGTGTAGGGAAAGAGTGT   |
| p1.2_EcoRI_GAATTCA          | GAATTCA        | [Phos]AATTTGAATTCAGATCGGAAGAGCGTCGTGTAGGGAAAGAGTGT   |
| p1.2_EcoRI_GAACCTC          | GAACCTC        | [Phos]AATTGAGGTTTCAGATCGGAAGAGCGTCGTGTAGGGAAAGAGTGT  |
| p1.2_EcoRI_GTCGATT          | GTCGATT        | [Phos]AATTAATCGACAGATCGGAAGAGCGTCGTGTAGGGAAAGAGTGT   |
| p1.2_EcoRI_AACGCCT          | AACGCCT        | [Phos]AATTAGGCGTTAGATCGGAAGAGCGTCGTGTAGGGAAAGAGTGT   |
| p1.2_EcoRI_AATATGC          | AATATGC        | [Phos]AATTGCATATTAGATCGGAAGAGCGTCGTGTAGGGAAAGAGTGT   |
| p1.2_EcoRI_ACGTGTT          | ACGTGTT        | [Phos]AATTAACACGTAGATCGGAAGAGCGTCGTGTAGGGAAAGAGTGT   |
| p1.2_EcoRI_ATTAAAT          | ATTAAAT        | [Phos]AATTAATTAATAGATCGGAAGAGCGTCGTGTAGGGAAAGAGTGT   |
| p1.2_EcoRI_ATTGGAT          | ATTGGAT        | [Phos]AATTAATCCAATAGATCGGAAGAGCGTCGTGTAGGGAAAGAGTGT  |
| p1.2_EcoRI_CATAAGT          | CATAAGT        | [Phos]AATTAATCTATGAGATCGGAAGAGCGTCGTGTAGGGAAAGAGTGT  |
| p1.2_EcoRI_CGCTGAT          | CGCTGAT        | [Phos]AATTAATCAGCGAGATCGGAAGAGCGTCGTGTAGGGAAAGAGTGT  |
| p1.2_EcoRI_CGGTAGA          | CGGTAGA        | [Phos]AATTTCTACCGAGATCGGAAGAGCGTCGTGTAGGGAAAGAGTGT   |
| p1.2_EcoRI_CTACGGA          | CTACGGA        | [Phos]AATTTCCGTAGAGATCGGAAGAGCGTCGTGTAGGGAAAGAGTGT   |
| p1.2_EcoRI_GCGGAAT          | GCGGAAT        | [Phos]AATTAATCCGCAGATCGGAAGAGCGTCGTGTAGGGAAAGAGTGT   |
| p1.2_EcoRI_TAGCGGA          | TAGCGGA        | [Phos]AATTTCCGCTAAGATCGGAAGAGCGTCGTGTAGGGAAAGAGTGT   |
| p1.2_EcoRI_TCGAAGA          | TCGAAGA        | [Phos]AATTTCTTCGAAGATCGGAAGAGCGTCGTGTAGGGAAAGAGTGT   |
| p1.2_EcoRI_TCTGTGA          | TCTGTGA        | [Phos]AATTTACAGAAGATCGGAAGAGCGTCGTGTAGGGAAAGAGTGT    |
| p1.2_EcoRI_TGCTGGA          | TGCTGGA        | [Phos]AATTTCCAGCAAGATCGGAAGAGCGTCGTGTAGGGAAAGAGTGT   |
| p1.2_EcoRI_ACGACTAC         | ACGACTAC       | [Phos]AATTGTAGTCGTAGATCGGAAGAGCGTCGTGTAGGGAAAGAGTGT  |
| p1.2_EcoRI_TAGCATGC         | TAGCATGC       | [Phos]AATTGCATGCTAAGATCGGAAGAGCGTCGTGTAGGGAAAGAGTGT  |
| p1.2_EcoRI_TAGGCCAT         | TAGGCCAT       | [Phos]AATTAATGGCCTAAGATCGGAAGAGCGTCGTGTAGGGAAAGAGTGT |
| p1.2_EcoRI_TGCAAGGA         | TGCAAGGA       | [Phos]AATTTCTTGAAGATCGGAAGAGCGTCGTGTAGGGAAAGAGTGT    |
| p1.2_EcoRI_TGGTACGT         | TGGTACGT       | [Phos]AATTACGTACCAAGATCGGAAGAGCGTCGTGTAGGGAAAGAGTGT  |
| p1.2_EcoRI_TCTCAGTC         | TCTCAGTC       | [Phos]AATTGACTGAGAAGATCGGAAGAGCGTCGTGTAGGGAAAGAGTGT  |
| p1.2_EcoRI_CCGGATAT         | CCGGATAT       | [Phos]AATTATATCCGGAGATCGGAAGAGCGTCGTGTAGGGAAAGAGTGT  |
| p1.2_EcoRI_CGCCTTAT         | CGCCTTAT       | [Phos]AATTATAAGGCCGAGATCGGAAGAGCGTCGTGTAGGGAAAGAGTGT |
| p1.2_EcoRI_AACCGAGA         | AACCGAGA       | [Phos]AATTTCTCGGTTAGATCGGAAGAGCGTCGTGTAGGGAAAGAGTGT  |
| p1.2_EcoRI_ACAGGGAA         | ACAGGGAA       | [Phos]AATTTTCCCTGTAGATCGGAAGAGCGTCGTGTAGGGAAAGAGTGT  |
| p1.2_EcoRI_ACGTGGTA         | ACGTGGTA       | [Phos]AATTTACCACGTAGATCGGAAGAGCGTCGTGTAGGGAAAGAGTGT  |
| p1.2_EcoRI_CCATGGGT         | CCATGGGT       | [Phos]AATTACCCATGGAGATCGGAAGAGCGTCGTGTAGGGAAAGAGTGT  |
| p1.2_EcoRI_CGCGGAGA         | CGCGGAGA       | [Phos]AATTTCTCCGCGAGATCGGAAGAGCGTCGTGTAGGGAAAGAGTGT  |
| p1.2_EcoRI_CGTGTGGT         | CGTGTGGT       | [Phos]AATTACCACACGAGATCGGAAGAGCGTCGTGTAGGGAAAGAGTGT  |
| p1.2_EcoRI_GCTGTGGA         | GCTGTGGA       | [Phos]AATTTCCACAGCAGATCGGAAGAGCGTCGTGTAGGGAAAGAGTGT  |
| p1.2_EcoRI_GGATTGGT         | GGATTGGT       | [Phos]AATTACCAATCCAGATCGGAAGAGCGTCGTGTAGGGAAAGAGTGT  |
| p1.2_EcoRI_GTGAGGGT         | GTGAGGGT       | [Phos]AATTACCCTCACAGATCGGAAGAGCGTCGTGTAGGGAAAGAGTGT  |
| p1.2_EcoRI_TATCGGGA         | TATCGGGA       | [Phos]AATTTCCCGATAAGATCGGAAGAGCGTCGTGTAGGGAAAGAGTGT  |
| p1.2_EcoRI_TTCCTGGA         | TTCCTGGA       | [Phos]AATTTCCAGGAAAGATCGGAAGAGCGTCGTGTAGGGAAAGAGTGT  |

**Supplementary Table 2** - HPSF-purified oligonucleotide sequences (Eurofins MWG Operon LLC, Huntsville, AL, USA) used to create MSP overhang, and primers used to add Illumina indices to each gDNA library.

| Oligo Name | Oligo Type             | Index  | Oligonucleotide Sequence 5'-3'                            |
|------------|------------------------|--------|-----------------------------------------------------------|
| MSPI_P2.1  | Adapter – MSP overhang | -      | GTGACTGGAGTTCAGACGTGTGCTCTTCCGATCT                        |
| MSPI_P2.2  | Adapter – MSP overhang | -      | [Phos]CGAGATCGGAAGAGCGAGAACAA                             |
| ddRAD_PCR1 | Primer – Forward       | -      | AATGATACGGCGACCACCGAGATCTACACTCTTTCCCTACACGACG            |
| PCR2_Idx1  | Primer – Reverse       | ATCACG | CAAGCAGAAGACGGCATACGAGATCGTGATGTGACTGGAGTTCA<br>GACGTGTGC |
| PCR2_Idx2  | Primer – Reverse       | CGATGT | CAAGCAGAAGACGGCATACGAGATACATCGGTGACTGGAGTTCA<br>GACGTGTGC |
| PCR2_Idx3  | Primer - Reverse       | TTAGGC | CAAGCAGAAGACGGCATACGAGATGCCTAAGTGACTGGAGTTCA<br>GACGTGTGC |
| PCR2_Idx4  | Primer - Reverse       | TGACCA | CAAGCAGAAGACGGCATACGAGATTGGTCAGTGACTGGAGTTCA<br>GACGTGTGC |
| PCR2_Idx6  | Primer – Reverse       | GCCAAT | CAAGCAGAAGACGGCATACGAGATATTGGCGTGACTGGAGTTCA<br>GACGTGTGC |
| PCR2_Idx12 | Primer – Reverse       | CTTGTA | CAAGCAGAAGACGGCATACGAGATTACAAGGTGACTGGAGTTCA<br>GACGTGTGC |
